# Supplementary material for: Photon avalanche assisted upconversionviacustomizing the green emission
Source: Royal Society of Chemistry journal article supplement (doi:10.1039/d3ra02894a), 2023-01-01
Supplement: d3ra02894a1.pdf [file d3ra02894a1.pdf]

**Photon avalanche assisted upconversion via customizing green emission**

Manisha Prasad and Vineet Kumar Rai\*

Laser and Spectroscopy Laboratory

Department of Physics

Indian Institute of Technology (Indian School of Mines)

Dhanbad-826004, Jharkhand, India

---

\* Corresponding Author:

Email address: [vineetkrrai@yahoo.co.in](mailto:vineetkrrai@yahoo.co.in); [vineetkrrai@iitism.ac.in](mailto:vineetkrrai@iitism.ac.in)

Phone no.:+91-326-223 5404/5282

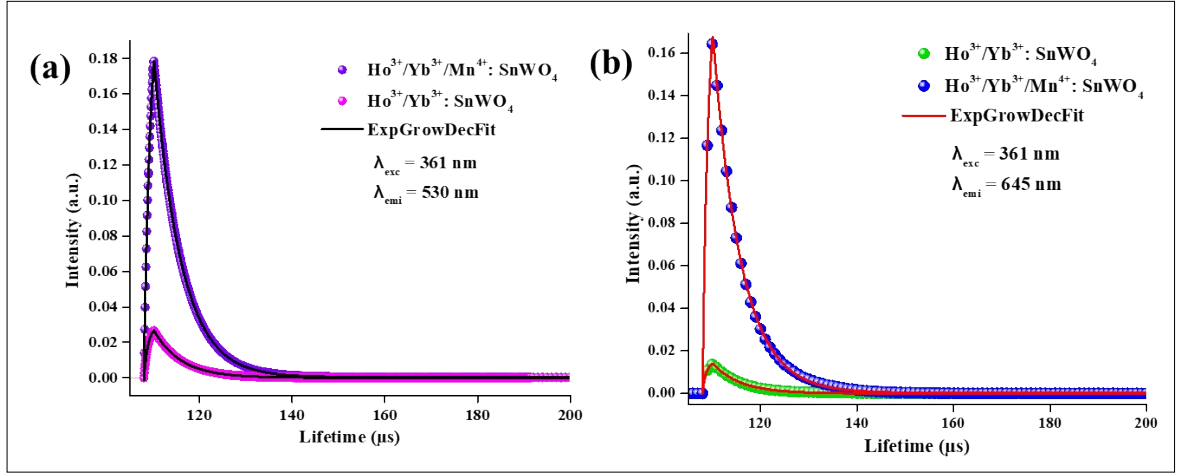

Fig.S. Decay curves of (a)  ${}^5\text{F}_4, {}^5\text{S}_2 \rightarrow {}^5\text{I}_8$  (530 nm) and (b)  ${}^5\text{F}_5 \rightarrow {}^5\text{I}_8$  (645 nm) emissions upon 361 nm excitation of  $\text{Ho}^{3+}/\text{Yb}^{3+}$  and  $\text{Ho}^{3+}/\text{Yb}^{3+}/\text{Mn}^{4+}:\text{SnWO}_4$  phosphors.
